# Supplementary material
Source: PubMed Central journal article supplement (PMC4188423)
Supplement: NIHMS619845-supplement-01.pdf [file NIHMS619845-supplement-01.pdf]

**SUPPLEMENTAL INFORMATION**

**Dominant lethal pathologies in male mice engineered to contain  
an X-linked DUX4 transgene.**

*Abhijit Dandapat\**, *Darko Bosnakovski\**, *Lynn M. Hartweck*, *Robert W. Arpke*, *Kristen A. Baltgalvis*, *Derek Vang*, *June Baik*, *Radbod Darabi*, *Rita C.R. Perlingeiro*, *F. Kent Hamra*, *Kalpna Gupta*, *Dawn A. Lowe* and *Michael Kyba*

## SUPPLEMENTAL FIGURE

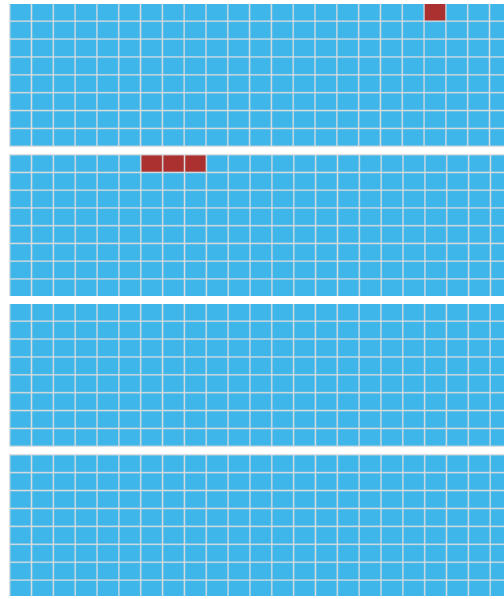

**Figure S1, related to Figure 4.**

Methylation of the iDUX4(2.7) transgene in cultured FACS-isolated myoblast cells from four additional male mice. Bisulfite-treated DNA was amplified by PCR, cloned and sequenced. Blue boxes indicate unmethylated cytosines of CpG dinucleotides and red boxes indicate methylated cytosines. These four replicates demonstrate extremely low levels of methylation of the transgene in iDux4(2.7) male mice.
