# Supplementary material
Source: PubMed Central journal article supplement (PMC4188423)
Supplement: NIHMS619845-supplement-02.pdf [file NIHMS619845-supplement-02.pdf]

## SUPPLEMENTAL EXPERIMENTAL PROCEDURES

**Culture of murine ES cells.** Mouse embryonic stem (ES) cells were cultured on irradiated MEFs in “Knockout” DMEM/ 15% fetal bovine serum (FBS), penicillin/streptomycin (Gibco), 2 mM glutamine, 0.1 mM nonessential amino acids (Gibco), 0.1 mM  $\beta$ -mercaptoethanol, and 1000 U/ml LIF (Millipore

**Growth Curves:** For growth analysis  $1 \times 10^5$  myoblasts or FAPs were plated on 35mm tissue culture plates and induced with 0, 12.5, 25 or 50 ng/ml dox. Every four days cells were passaged, cell numbers were counted from triplicate wells of each passage, and  $1 \times 10^5$  cells were replated in the same conditions. Paired myoblast and fibroblast samples from 3 iDux4(2.7) and 3 WT littermates were used.

**Isolation of satellite cells:** Hind limb muscles were dissected, chopped into pieces parallel to the muscle fibers and digested in 0.2% collagenase type II (Gibco 17101-015) at 37°C for 75 minutes and washed two times. To remove satellite cells from the muscle fibers, the sample was incubated with 0.01 % collagenase II and 0.15 % dispase (Gibco, 17105-041) at 37°C for 30 minutes, passed through syringe with 16-18 gage needles, strained through a 40  $\mu$ m cell strainer(BD Falcon) and washed two times. The sample was resuspended in FACS staining medium: PBS (HyClone, SH30256.01) containing 2% FBS (Equitech) and cells were sorted on a Cytomation MoFlo cytometer (Dako), either for ZsGreen fluorescence, or in an independent experiment that gave similar results, for the CD31– CD45– VCAM+ integrin- $\alpha$ 7 profile.
